# Supplementary material
Source: Springer Nature journal article supplement (https://www.springermedizin.de/resource/supplementary/12889_2009_2112_MOESM6_ESM.pdf/9484614)

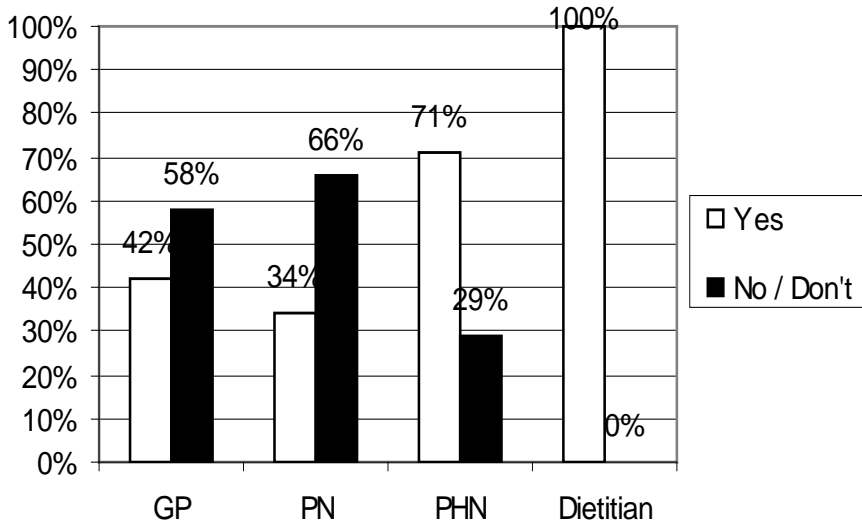

Supplement: MOESM6 [file 9484614]
